# Supplementary material
Source: PubMed Central journal article supplement (PMC240713)

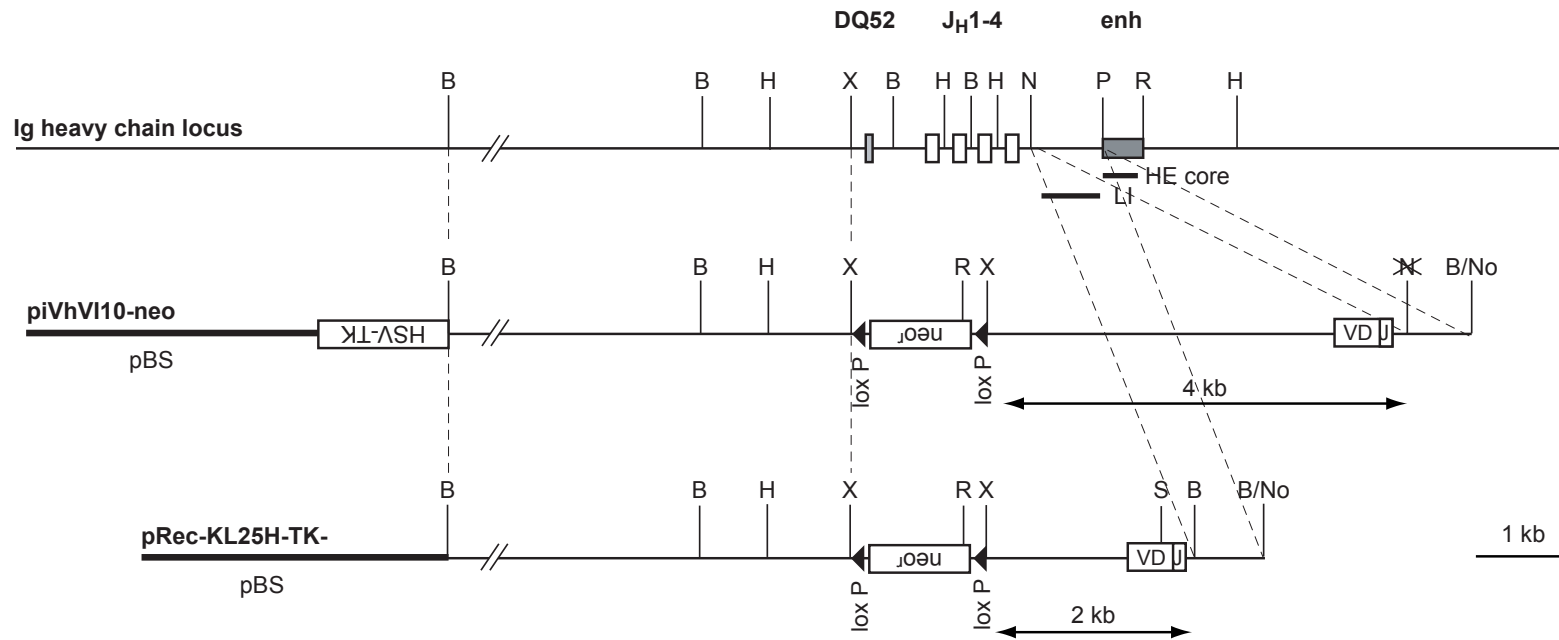

Supplement: pnas_100_22_12883__2.pdf [file pnas_100_22_12883__2.pdf]

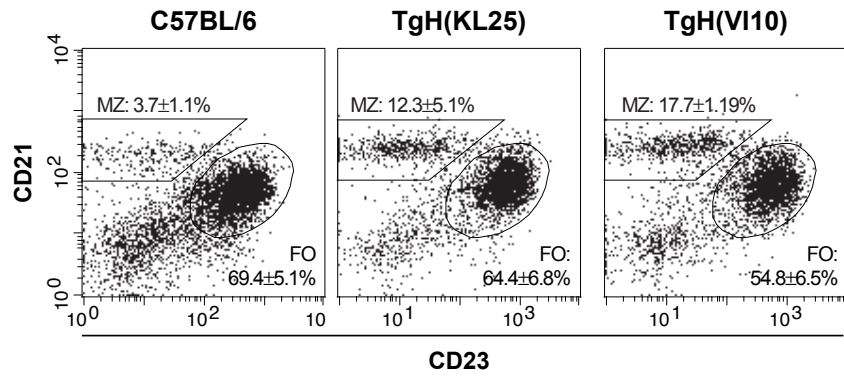

Supplement: pnas_100_22_12883__4.pdf [file pnas_100_22_12883__4.pdf]

**A**

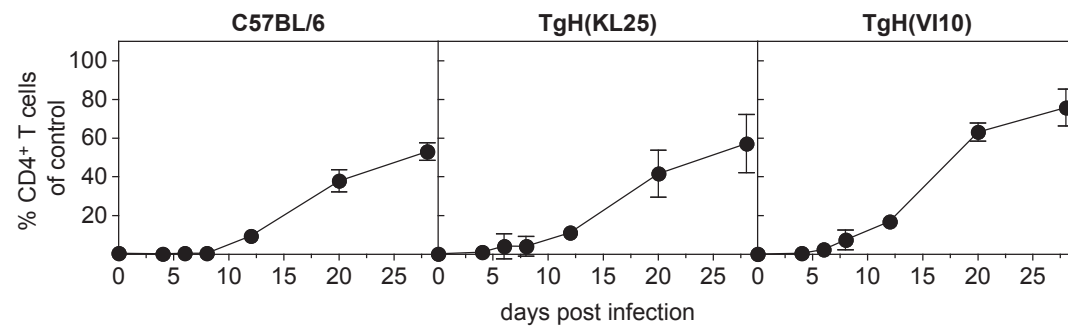

**B**

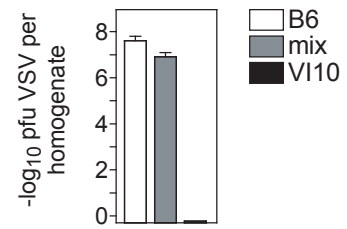

Supplement: pnas_100_22_12883__6.pdf [file pnas_100_22_12883__6.pdf]

**A****day 8**  
primary ex vivo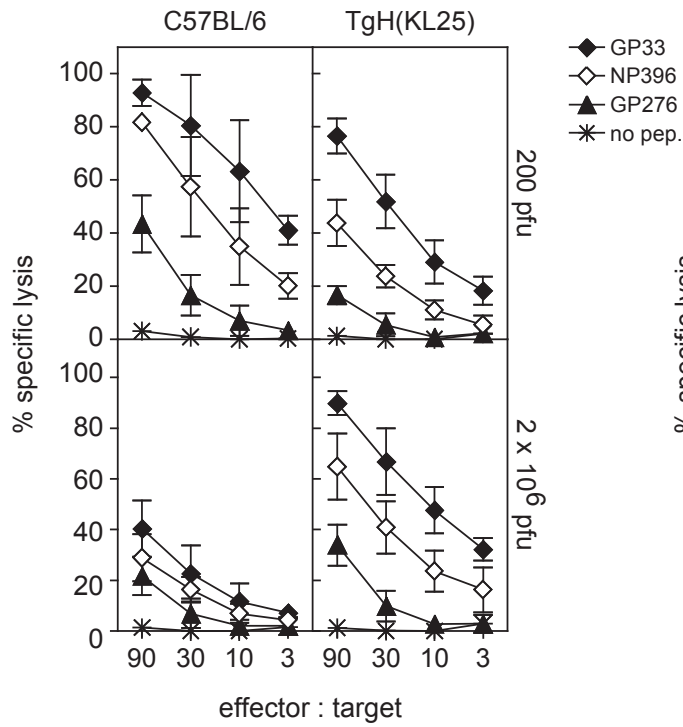**B****day 57**  
restimulated *in vitro*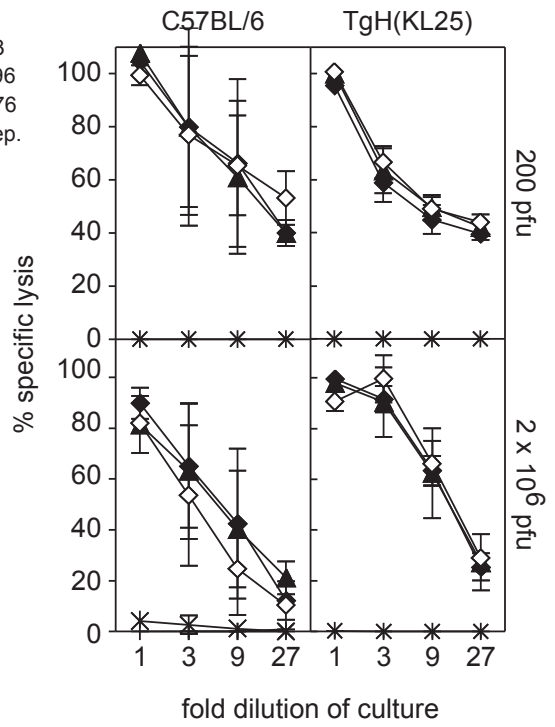**C**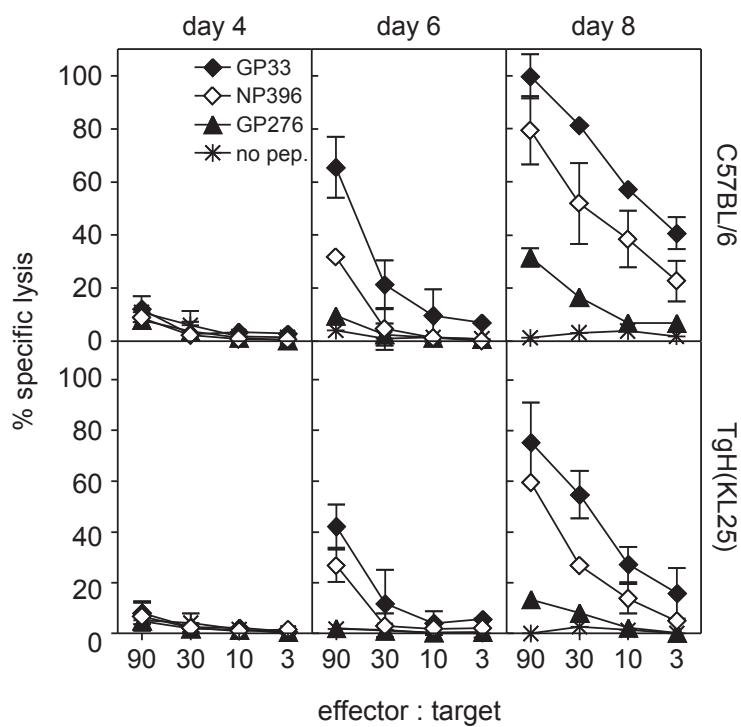**D**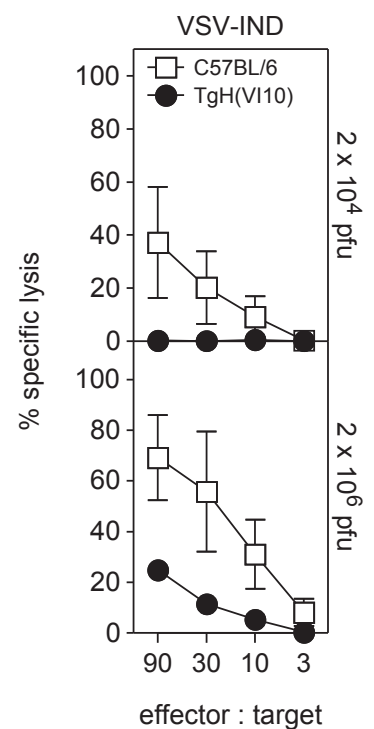

Supplement: pnas_100_22_12883__8.pdf [file pnas_100_22_12883__8.pdf]
